# Supplementary material for: The Prognostic Value and Function of HOXB5 in Acute Myeloid Leukemia
Source: Front Genet. 2021 Aug 5;12:678368. doi: 10.3389/fgene.2021.678368 (PMC8376581; doi:10.3389/fgene.2021.678368)
Supplement: Supplementary file 13 [file Table_6.XLSX]

## Sheet: HOXB5
Gene Symbol	CNV	Expression
TCGA-AB-2813-03	-1	0
TCGA-AB-2955-03	-1	0
TCGA-AB-2941-03	-1	0.0305
TCGA-AB-2908-03	-1	0.0332
TCGA-AB-2860-03	-1	1.2454
TCGA-AB-2935-03	-1	1.6722
TCGA-AB-2814-03	0	0
TCGA-AB-2822-03	0	0
TCGA-AB-2823-03	0	0
TCGA-AB-2832-03	0	0
TCGA-AB-2840-03	0	0
TCGA-AB-2845-03	0	0
TCGA-AB-2858-03	0	0
TCGA-AB-2862-03	0	0
TCGA-AB-2867-03	0	0
TCGA-AB-2868-03	0	0
TCGA-AB-2874-03	0	0
TCGA-AB-2875-03	0	0
TCGA-AB-2880-03	0	0
TCGA-AB-2886-03	0	0
TCGA-AB-2894-03	0	0
TCGA-AB-2897-03	0	0
TCGA-AB-2909-03	0	0
TCGA-AB-2911-03	0	0
TCGA-AB-2915-03	0	0
TCGA-AB-2940-03	0	0
TCGA-AB-2954-03	0	0
TCGA-AB-2956-03	0	0
TCGA-AB-2966-03	0	0
TCGA-AB-2991-03	0	0
TCGA-AB-2994-03	0	0
TCGA-AB-2998-03	0	0
TCGA-AB-2999-03	0	0
TCGA-AB-3005-03	0	0
TCGA-AB-2846-03	0	0.0164
TCGA-AB-2937-03	0	0.025
TCGA-AB-2888-03	0	0.0283
TCGA-AB-2806-03	0	0.029
TCGA-AB-2939-03	0	0.0298
TCGA-AB-2863-03	0	0.0315
TCGA-AB-3000-03	0	0.0332
TCGA-AB-2834-03	0	0.0366
TCGA-AB-2803-03	0	0.0403
TCGA-AB-2872-03	0	0.0424
TCGA-AB-2964-03	0	0.044
TCGA-AB-2819-03	0	0.0466
TCGA-AB-3008-03	0	0.0468
TCGA-AB-2946-03	0	0.0477
TCGA-AB-2854-03	0	0.0544
TCGA-AB-3001-03	0	0.057
TCGA-AB-2841-03	0	0.0592
TCGA-AB-2910-03	0	0.0625
TCGA-AB-2881-03	0	0.0653
TCGA-AB-3007-03	0	0.0674
TCGA-AB-2844-03	0	0.07
TCGA-AB-2914-03	0	0.072
TCGA-AB-2808-03	0	0.0756
TCGA-AB-2893-03	0	0.0809
TCGA-AB-3002-03	0	0.082
TCGA-AB-2870-03	0	0.0949
TCGA-AB-2929-03	0	0.0953
TCGA-AB-3009-03	0	0.1011
TCGA-AB-2942-03	0	0.1026
TCGA-AB-2950-03	0	0.103
TCGA-AB-2892-03	0	0.1247
TCGA-AB-3012-03	0	0.1249
TCGA-AB-2889-03	0	0.1272
TCGA-AB-2944-03	0	0.1334
TCGA-AB-2815-03	0	0.1493
TCGA-AB-2883-03	0	0.1675
TCGA-AB-2807-03	0	0.1956
TCGA-AB-2982-03	0	0.2191
TCGA-AB-2882-03	0	0.2282
TCGA-AB-2980-03	0	0.2409
TCGA-AB-2938-03	0	0.248
TCGA-AB-2899-03	0	0.3081
TCGA-AB-2936-03	0	0.3261
TCGA-AB-2817-03	0	0.3688
TCGA-AB-2904-03	0	0.402
TCGA-AB-2842-03	0	0.4378
TCGA-AB-2821-03	0	0.5581
TCGA-AB-2901-03	0	0.573
TCGA-AB-2985-03	0	0.6052
TCGA-AB-2828-03	0	0.9827
TCGA-AB-2992-03	0	0.9883
TCGA-AB-2857-03	0	1.0598
TCGA-AB-2865-03	0	1.0907
TCGA-AB-2959-03	0	1.4044
TCGA-AB-2805-03	0	1.5241
TCGA-AB-2975-03	0	1.5764
TCGA-AB-2995-03	0	1.6568
TCGA-AB-2983-03	0	1.6948
TCGA-AB-2916-03	0	1.7282
TCGA-AB-2878-03	0	1.7324
TCGA-AB-2952-03	0	1.7631
TCGA-AB-2912-03	0	1.7841
TCGA-AB-2996-03	0	1.8762
TCGA-AB-2948-03	0	1.9115
TCGA-AB-2887-03	0	1.9678
TCGA-AB-2943-03	0	1.9839
TCGA-AB-2890-03	0	2.0226
TCGA-AB-2919-03	0	2.0378
TCGA-AB-2970-03	0	2.0915
TCGA-AB-2898-03	0	2.228
TCGA-AB-2927-03	0	2.4243
TCGA-AB-2820-03	0	2.6295
TCGA-AB-2885-03	0	2.7257
TCGA-AB-2978-03	0	2.936
TCGA-AB-2871-03	0	2.9712
TCGA-AB-2913-03	0	3.042
TCGA-AB-2949-03	0	3.0557
TCGA-AB-2984-03	0	3.1004
TCGA-AB-2830-03	0	3.1062
TCGA-AB-2866-03	0	3.1084
TCGA-AB-3006-03	0	3.1133
TCGA-AB-2826-03	0	3.132
TCGA-AB-2859-03	0	3.2263
TCGA-AB-2873-03	0	3.2723
TCGA-AB-2895-03	0	3.2799
TCGA-AB-2839-03	0	3.2853
TCGA-AB-2825-03	0	3.3431
TCGA-AB-2930-03	0	3.353
TCGA-AB-2838-03	0	3.358
TCGA-AB-2993-03	0	3.3717
TCGA-AB-2921-03	0	3.3959
TCGA-AB-2988-03	0	3.4541
TCGA-AB-2934-03	0	3.4611
TCGA-AB-2931-03	0	3.4659
TCGA-AB-2836-03	0	3.4813
TCGA-AB-2976-03	0	3.5092
TCGA-AB-2928-03	0	3.5102
TCGA-AB-2869-03	0	3.515
TCGA-AB-2896-03	0	3.5157
TCGA-AB-2837-03	0	3.5339
TCGA-AB-2877-03	0	3.5523
TCGA-AB-2971-03	0	3.5596
TCGA-AB-2987-03	0	3.609
TCGA-AB-2856-03	0	3.6803
TCGA-AB-2816-03	0	3.6857
TCGA-AB-3011-03	0	3.6887
TCGA-AB-2965-03	0	3.755
TCGA-AB-2884-03	0	3.779
TCGA-AB-2986-03	0	3.8331
TCGA-AB-2924-03	0	3.8373
TCGA-AB-2920-03	0	3.8467
TCGA-AB-2963-03	0	3.8605
TCGA-AB-2812-03	0	3.8701
TCGA-AB-2879-03	0	3.875
TCGA-AB-2973-03	0	3.9168
TCGA-AB-2972-03	0	3.9259
TCGA-AB-2835-03	0	3.9454
TCGA-AB-2810-03	0	3.9658
TCGA-AB-2851-03	0	3.9971
TCGA-AB-2967-03	0	4.0068
TCGA-AB-2900-03	0	4.1001
TCGA-AB-2969-03	0	4.1214
TCGA-AB-2818-03	0	4.137
TCGA-AB-2903-03	0	4.3385
TCGA-AB-2932-03	0	4.3614
TCGA-AB-2925-03	0	4.4587
TCGA-AB-2990-03	0	4.5015
TCGA-AB-2853-03	0	4.5115
TCGA-AB-2848-03	0	4.6489
TCGA-AB-2977-03	0	4.8393
TCGA-AB-2861-03	0	5.1242
TCGA-AB-2824-03	0	5.1571
TCGA-AB-2811-03	0	6.1317
TCGA-AB-2855-03	1	0
TCGA-AB-2917-03	1	0
TCGA-AB-2849-03	1	0.1104
TCGA-AB-2933-03	1	1.707

## Sheet: HOXA7
Gene Symbol	CNV	Expression
TCGA-AB-2806-03	-2	0.0898
TCGA-AB-2874-03	-1	0
TCGA-AB-2817-03	-1	0.5097
TCGA-AB-2941-03	-1	0.5492
TCGA-AB-2882-03	-1	1.0722
TCGA-AB-2944-03	-1	1.601
TCGA-AB-2838-03	-1	1.9992
TCGA-AB-2929-03	-1	2.3126
TCGA-AB-2935-03	-1	2.4285
TCGA-AB-2857-03	-1	2.4546
TCGA-AB-2928-03	-1	2.58
TCGA-AB-2949-03	-1	3.1152
TCGA-AB-2917-03	-1	3.154
TCGA-AB-2952-03	-1	3.1924
TCGA-AB-2885-03	-1	3.3941
TCGA-AB-2920-03	-1	3.8139
TCGA-AB-2894-03	-1	5.1355
TCGA-AB-2823-03	0	0
TCGA-AB-2840-03	0	0
TCGA-AB-2846-03	0	0
TCGA-AB-2862-03	0	0
TCGA-AB-2875-03	0	0
TCGA-AB-2880-03	0	0
TCGA-AB-2886-03	0	0
TCGA-AB-2892-03	0	0
TCGA-AB-2937-03	0	0
TCGA-AB-2942-03	0	0
TCGA-AB-2950-03	0	0
TCGA-AB-2954-03	0	0
TCGA-AB-2955-03	0	0
TCGA-AB-2994-03	0	0
TCGA-AB-2998-03	0	0
TCGA-AB-3000-03	0	0
TCGA-AB-3007-03	0	0
TCGA-AB-2803-03	0	0.0183
TCGA-AB-2867-03	0	0.0209
TCGA-AB-2888-03	0	0.0256
TCGA-AB-2841-03	0	0.027
TCGA-AB-2889-03	0	0.0297
TCGA-AB-2815-03	0	0.0298
TCGA-AB-2881-03	0	0.0298
TCGA-AB-2808-03	0	0.0346
TCGA-AB-2991-03	0	0.0348
TCGA-AB-2872-03	0	0.0384
TCGA-AB-2845-03	0	0.0541
TCGA-AB-2828-03	0	0.0623
TCGA-AB-2940-03	0	0.0631
TCGA-AB-2858-03	0	0.0635
TCGA-AB-2897-03	0	0.0767
TCGA-AB-3008-03	0	0.0797
TCGA-AB-2946-03	0	0.0852
TCGA-AB-2910-03	0	0.0895
TCGA-AB-2819-03	0	0.1098
TCGA-AB-2999-03	0	0.1098
TCGA-AB-2980-03	0	0.1551
TCGA-AB-3012-03	0	0.1592
TCGA-AB-3001-03	0	0.1807
TCGA-AB-2938-03	0	0.2135
TCGA-AB-2982-03	0	0.2224
TCGA-AB-3009-03	0	0.3702
TCGA-AB-2865-03	0	0.3747
TCGA-AB-2916-03	0	0.4609
TCGA-AB-2996-03	0	0.7913
TCGA-AB-2912-03	0	0.8129
TCGA-AB-2927-03	0	1.0733
TCGA-AB-2856-03	0	1.1994
TCGA-AB-2959-03	0	1.2611
TCGA-AB-2914-03	0	1.2649
TCGA-AB-2870-03	0	1.4494
TCGA-AB-2813-03	0	1.4916
TCGA-AB-2966-03	0	1.5033
TCGA-AB-2822-03	0	1.6554
TCGA-AB-2854-03	0	1.8879
TCGA-AB-2805-03	0	2.1158
TCGA-AB-2807-03	0	2.268
TCGA-AB-2909-03	0	2.3044
TCGA-AB-3002-03	0	2.3116
TCGA-AB-2987-03	0	2.3847
TCGA-AB-2898-03	0	2.4145
TCGA-AB-2860-03	0	2.4464
TCGA-AB-2992-03	0	2.4963
TCGA-AB-2936-03	0	2.5018
TCGA-AB-2863-03	0	2.5996
TCGA-AB-2915-03	0	2.6244
TCGA-AB-2890-03	0	2.7082
TCGA-AB-2820-03	0	2.8658
TCGA-AB-2901-03	0	2.9333
TCGA-AB-2873-03	0	3.0167
TCGA-AB-2821-03	0	3.0295
TCGA-AB-2933-03	0	3.0564
TCGA-AB-2868-03	0	3.2136
TCGA-AB-2930-03	0	3.2207
TCGA-AB-2995-03	0	3.2239
TCGA-AB-2849-03	0	3.3181
TCGA-AB-2948-03	0	3.4044
TCGA-AB-2943-03	0	3.4654
TCGA-AB-2939-03	0	3.5522
TCGA-AB-2934-03	0	3.5752
TCGA-AB-2978-03	0	3.5945
TCGA-AB-2970-03	0	3.832
TCGA-AB-2983-03	0	3.8389
TCGA-AB-2908-03	0	3.8394
TCGA-AB-2830-03	0	3.9254
TCGA-AB-2814-03	0	3.9497
TCGA-AB-2837-03	0	4.0245
TCGA-AB-2985-03	0	4.0572
TCGA-AB-2964-03	0	4.1132
TCGA-AB-2973-03	0	4.1196
TCGA-AB-2899-03	0	4.1485
TCGA-AB-2816-03	0	4.1599
TCGA-AB-2904-03	0	4.2115
TCGA-AB-2832-03	0	4.2355
TCGA-AB-2855-03	0	4.2688
TCGA-AB-2839-03	0	4.319
TCGA-AB-2975-03	0	4.3409
TCGA-AB-2971-03	0	4.3757
TCGA-AB-2967-03	0	4.3775
TCGA-AB-2834-03	0	4.3878
TCGA-AB-2851-03	0	4.4086
TCGA-AB-2900-03	0	4.4473
TCGA-AB-2836-03	0	4.4882
TCGA-AB-2825-03	0	4.5128
TCGA-AB-2871-03	0	4.5197
TCGA-AB-3005-03	0	4.5245
TCGA-AB-2844-03	0	4.5309
TCGA-AB-3011-03	0	4.5508
TCGA-AB-3006-03	0	4.5658
TCGA-AB-2956-03	0	4.671
TCGA-AB-2812-03	0	4.6758
TCGA-AB-2972-03	0	4.7123
TCGA-AB-2810-03	0	4.7192
TCGA-AB-2859-03	0	4.7601
TCGA-AB-2883-03	0	4.7633
TCGA-AB-2993-03	0	4.7844
TCGA-AB-2848-03	0	4.8153
TCGA-AB-2924-03	0	4.8229
TCGA-AB-2963-03	0	4.8235
TCGA-AB-2911-03	0	4.8443
TCGA-AB-2818-03	0	4.8855
TCGA-AB-2988-03	0	4.8864
TCGA-AB-2921-03	0	4.8987
TCGA-AB-2932-03	0	4.907
TCGA-AB-2896-03	0	4.9253
TCGA-AB-2976-03	0	4.934
TCGA-AB-2919-03	0	4.9413
TCGA-AB-2895-03	0	4.9631
TCGA-AB-2913-03	0	4.9799
TCGA-AB-2826-03	0	4.9933
TCGA-AB-2861-03	0	5.0025
TCGA-AB-2811-03	0	5.0053
TCGA-AB-2884-03	0	5.008
TCGA-AB-2853-03	0	5.0998
TCGA-AB-2965-03	0	5.1096
TCGA-AB-2835-03	0	5.1155
TCGA-AB-2977-03	0	5.1612
TCGA-AB-2877-03	0	5.2012
TCGA-AB-2866-03	0	5.2135
TCGA-AB-2869-03	0	5.2423
TCGA-AB-2824-03	0	5.2498
TCGA-AB-2990-03	0	5.2521
TCGA-AB-2879-03	0	5.3064
TCGA-AB-2931-03	0	5.3727
TCGA-AB-2842-03	0	5.38
TCGA-AB-2984-03	0	5.4345
TCGA-AB-2986-03	0	5.6539
TCGA-AB-2925-03	0	5.7095
TCGA-AB-2893-03	0	5.8048
TCGA-AB-2903-03	0	5.8367
TCGA-AB-2969-03	0	5.889
TCGA-AB-2878-03	1	3.086
TCGA-AB-2887-03	2	3.2246

## Sheet: HOXB4
Gene Symbol	CNV	Expression
TCGA-AB-2955-03	-1	0.0862
TCGA-AB-2813-03	-1	0.2813
TCGA-AB-2908-03	-1	1.051
TCGA-AB-2860-03	-1	2.5086
TCGA-AB-2935-03	-1	2.6784
TCGA-AB-2941-03	-1	3.4611
TCGA-AB-2897-03	0	0
TCGA-AB-2893-03	0	0.0124
TCGA-AB-2874-03	0	0.0178
TCGA-AB-2998-03	0	0.0317
TCGA-AB-2806-03	0	0.0492
TCGA-AB-2858-03	0	0.063
TCGA-AB-2832-03	0	0.0654
TCGA-AB-2814-03	0	0.0668
TCGA-AB-2880-03	0	0.0707
TCGA-AB-2823-03	0	0.0789
TCGA-AB-2886-03	0	0.0861
TCGA-AB-3000-03	0	0.1015
TCGA-AB-2946-03	0	0.1113
TCGA-AB-2845-03	0	0.1303
TCGA-AB-2950-03	0	0.1512
TCGA-AB-2808-03	0	0.1831
TCGA-AB-2966-03	0	0.1932
TCGA-AB-2939-03	0	0.2013
TCGA-AB-2822-03	0	0.2213
TCGA-AB-3007-03	0	0.2242
TCGA-AB-2994-03	0	0.2472
TCGA-AB-2807-03	0	0.2518
TCGA-AB-2991-03	0	0.255
TCGA-AB-2803-03	0	0.2666
TCGA-AB-3008-03	0	0.2858
TCGA-AB-3005-03	0	0.3025
TCGA-AB-2819-03	0	0.3029
TCGA-AB-2841-03	0	0.3039
TCGA-AB-2999-03	0	0.3094
TCGA-AB-2872-03	0	0.3192
TCGA-AB-3001-03	0	0.3351
TCGA-AB-2956-03	0	0.344
TCGA-AB-2862-03	0	0.3658
TCGA-AB-2867-03	0	0.3664
TCGA-AB-3012-03	0	0.3664
TCGA-AB-2840-03	0	0.3781
TCGA-AB-2937-03	0	0.3844
TCGA-AB-2894-03	0	0.4082
TCGA-AB-2875-03	0	0.41
TCGA-AB-2940-03	0	0.4431
TCGA-AB-2915-03	0	0.4563
TCGA-AB-2980-03	0	0.5959
TCGA-AB-2910-03	0	0.6587
TCGA-AB-2982-03	0	0.7161
TCGA-AB-3002-03	0	0.8022
TCGA-AB-2842-03	0	0.8759
TCGA-AB-2882-03	0	0.8831
TCGA-AB-2888-03	0	1.3588
TCGA-AB-2904-03	0	1.4141
TCGA-AB-2857-03	0	1.7016
TCGA-AB-2854-03	0	1.7366
TCGA-AB-2863-03	0	1.9309
TCGA-AB-2866-03	0	2.0132
TCGA-AB-2834-03	0	2.1918
TCGA-AB-2844-03	0	2.2389
TCGA-AB-2911-03	0	2.2567
TCGA-AB-2916-03	0	2.3672
TCGA-AB-2909-03	0	2.3739
TCGA-AB-2883-03	0	2.4282
TCGA-AB-2868-03	0	2.4464
TCGA-AB-2948-03	0	2.551
TCGA-AB-2805-03	0	2.6234
TCGA-AB-2977-03	0	2.6664
TCGA-AB-2959-03	0	2.7015
TCGA-AB-2936-03	0	2.7873
TCGA-AB-2821-03	0	2.8041
TCGA-AB-2899-03	0	2.8194
TCGA-AB-2912-03	0	2.8211
TCGA-AB-2964-03	0	2.827
TCGA-AB-2992-03	0	2.8367
TCGA-AB-2938-03	0	2.9105
TCGA-AB-2943-03	0	2.9188
TCGA-AB-2846-03	0	2.9519
TCGA-AB-2815-03	0	3.0171
TCGA-AB-2929-03	0	3.021
TCGA-AB-2944-03	0	3.0317
TCGA-AB-2828-03	0	3.0458
TCGA-AB-2901-03	0	3.0461
TCGA-AB-2985-03	0	3.0496
TCGA-AB-2890-03	0	3.0594
TCGA-AB-2914-03	0	3.1717
TCGA-AB-2898-03	0	3.202
TCGA-AB-2817-03	0	3.2505
TCGA-AB-2952-03	0	3.2833
TCGA-AB-2987-03	0	3.3154
TCGA-AB-2889-03	0	3.3275
TCGA-AB-2949-03	0	3.3491
TCGA-AB-2865-03	0	3.3845
TCGA-AB-2954-03	0	3.3862
TCGA-AB-2887-03	0	3.3971
TCGA-AB-2978-03	0	3.4045
TCGA-AB-2870-03	0	3.405
TCGA-AB-2927-03	0	3.4057
TCGA-AB-2885-03	0	3.4739
TCGA-AB-2878-03	0	3.4787
TCGA-AB-2892-03	0	3.5245
TCGA-AB-2975-03	0	3.5577
TCGA-AB-2995-03	0	3.5673
TCGA-AB-2873-03	0	3.6561
TCGA-AB-2881-03	0	3.6622
TCGA-AB-2942-03	0	3.9178
TCGA-AB-2928-03	0	3.9259
TCGA-AB-2838-03	0	3.9336
TCGA-AB-2996-03	0	3.961
TCGA-AB-2826-03	0	4.0495
TCGA-AB-2983-03	0	4.0711
TCGA-AB-2970-03	0	4.1768
TCGA-AB-3009-03	0	4.2974
TCGA-AB-2856-03	0	4.3671
TCGA-AB-2820-03	0	4.4191
TCGA-AB-2900-03	0	4.4199
TCGA-AB-2830-03	0	4.4665
TCGA-AB-2921-03	0	4.5231
TCGA-AB-2930-03	0	4.576
TCGA-AB-2837-03	0	4.5789
TCGA-AB-2825-03	0	4.5939
TCGA-AB-2919-03	0	4.6418
TCGA-AB-2853-03	0	4.6809
TCGA-AB-2851-03	0	4.691
TCGA-AB-2971-03	0	4.7017
TCGA-AB-2835-03	0	4.7239
TCGA-AB-2859-03	0	4.735
TCGA-AB-2810-03	0	4.7803
TCGA-AB-2990-03	0	4.8012
TCGA-AB-3006-03	0	4.862
TCGA-AB-2818-03	0	4.899
TCGA-AB-2871-03	0	4.926
TCGA-AB-2877-03	0	4.9442
TCGA-AB-2963-03	0	5.0035
TCGA-AB-2967-03	0	5.0108
TCGA-AB-2920-03	0	5.0247
TCGA-AB-2836-03	0	5.0276
TCGA-AB-2965-03	0	5.0764
TCGA-AB-2973-03	0	5.0883
TCGA-AB-2884-03	0	5.1006
TCGA-AB-3011-03	0	5.1022
TCGA-AB-2969-03	0	5.133
TCGA-AB-2816-03	0	5.1432
TCGA-AB-2932-03	0	5.1477
TCGA-AB-2896-03	0	5.1782
TCGA-AB-2913-03	0	5.2205
TCGA-AB-2976-03	0	5.2362
TCGA-AB-2924-03	0	5.2634
TCGA-AB-2824-03	0	5.2773
TCGA-AB-2812-03	0	5.2855
TCGA-AB-2848-03	0	5.2925
TCGA-AB-2988-03	0	5.3046
TCGA-AB-2972-03	0	5.3841
TCGA-AB-2839-03	0	5.3865
TCGA-AB-2861-03	0	5.436
TCGA-AB-2925-03	0	5.5027
TCGA-AB-2984-03	0	5.5316
TCGA-AB-2993-03	0	5.5609
TCGA-AB-2895-03	0	5.5761
TCGA-AB-2869-03	0	5.6671
TCGA-AB-2931-03	0	5.704
TCGA-AB-2934-03	0	5.8723
TCGA-AB-2811-03	0	5.945
TCGA-AB-2879-03	0	5.9696
TCGA-AB-2986-03	0	6.1102
TCGA-AB-2903-03	0	6.2547
TCGA-AB-2855-03	1	0
TCGA-AB-2849-03	1	0.2451
TCGA-AB-2917-03	1	0.9778
TCGA-AB-2933-03	1	2.918
